# Supplementary material for: Bitterness quantification and simulated taste mechanism of theasinensin A from tea
Source: PubMed Central journal article supplement (PMC10203438; doi:10.3389/fnut.2023.1138023), 2023-05-09

Supplementary materials

The representative HPLC chromatographs of black tea:

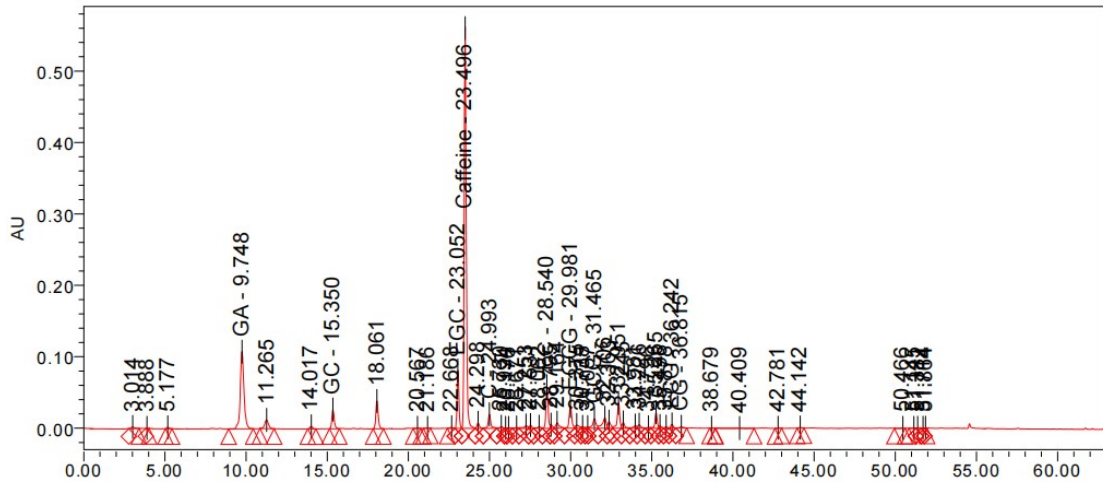

The representative HPLC chromatographs of oolong tea:

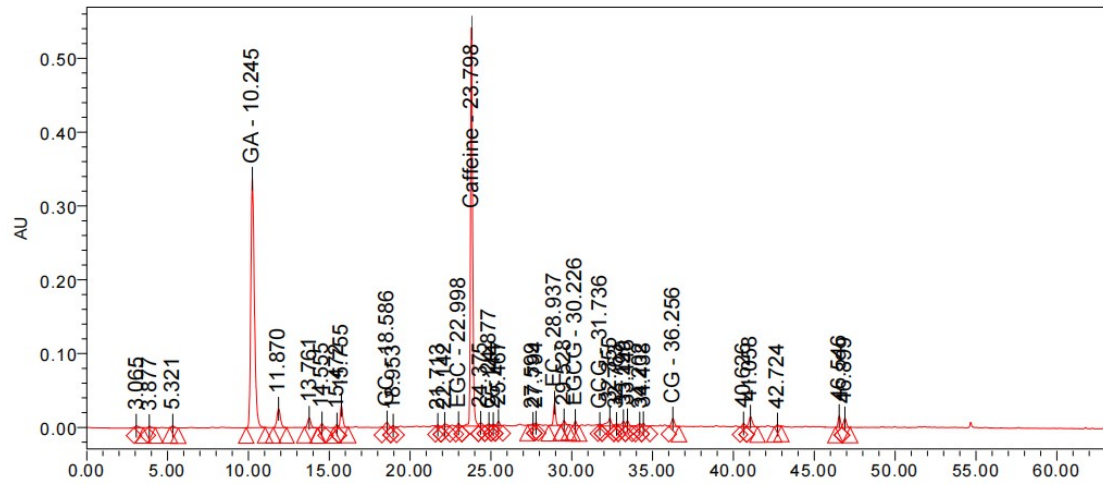

The representative HPLC chromatographs of green tea:

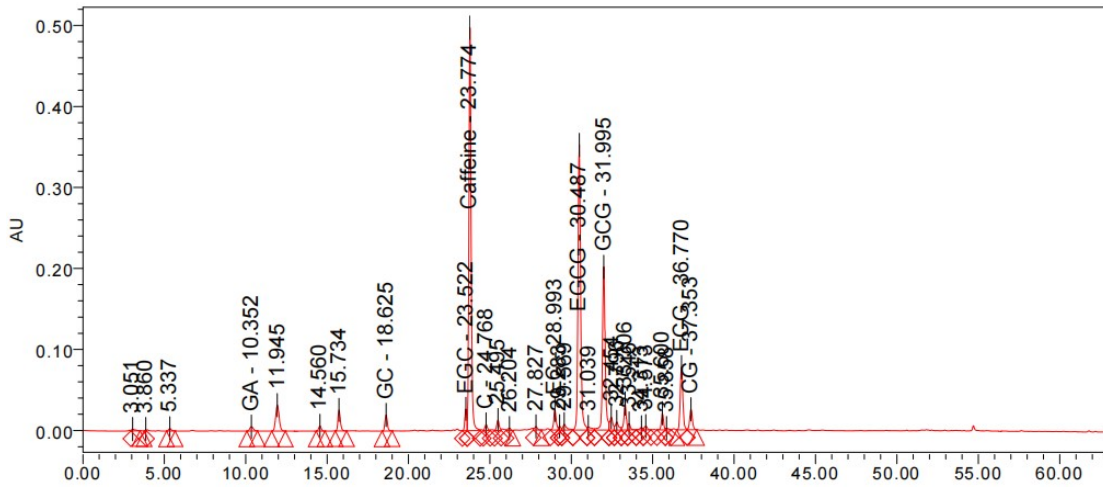

Supplement: Data_Sheet_1.pdf [file Data_Sheet_1.pdf]
